# Supplementary material for: Concurrence of ferroelectricity and metallicity in perovskite ultrathin films
Source: Research Square preprint supplement (doi:10.21203/rs.3.rs-8747287/v1), 2026-02-10
Supplement: Supplementary file 1 [file 4deda692bc05bd2b3c35a7a2.docx]

**Extended Data for**

**Concurrence of ferroelectricity and metallicity in perovskite ultrathin films**

Hongxu Duan1†, Zhihao Gao2,3†, Tao Li1, 4*, Yan Li1,Feiyan Hou1, Junying Zhang5, Yifeng Ren3, Yue Liu1, Yuhao Qiu6, Shenghao Cai6, Yaolin Wang1, Xi Deng3, Shaohao Wang4, Tiaoyang Li4, Yanqing Wu4, 7, Yu Deng3, Jiangjing Wang5, Di Wu3, Xuegang Chen6, Yuefeng Nie3, Hongtao Yuan3, Fei Li8, Yurong Yang3*, Tai Min1, 2, 3,4*

1Center for Spintronics and Quantum Systems (CSQS), State Key Laboratory for Mechanical Behavior of Materials and School of Materials Science and Engineering, Xi’an Jiaotong University, Xi’an, Shaanxi 710049, China.

2School of Advanced Manufacturing Engineering, Nanjing University, Suzhou 215163, China.

3State Key Laboratory of Solid State Microstructures, Nanjing University, Nanjing 210093, China.

4FZU-Jinjiang Joint Institute of Microelectronics, Jinjiang Campus, Fuzhou University, Jinjiang 362200, China.

5Center for Alloy Innovation and Design (CAID), State Key Laboratory for Mechanical Behavior of Materials, Xi'an Jiaotong University, Xi'an, Shaanxi 710049, China.

6Center of Free Electron Laser and High Magnetic Field, State Key Laboratory of Opto-Electronic Information Acquisition and Protection Technology, Anhui Provincial Key Laboratory of Magnetic Functional Materials and Devices, Anhui University, Hefei 230601, China.

7School of Integrated Circuits and Beijing Advanced Innovation Center for Integrated Circuits, Peking University, Beijing 100871, China.

8Electronic Materials Research Laboratory (Key Lab of Education Ministry), State Key Laboratory for Mechanical Behavior of Materials and School of Electronic and Information Engineering, Xi'an Jiaotong University, Xi’an, Shaanxi 710049, China.

*Corresponding author. Email: tai.min@nju.edu.cn (T.M.); yangyr@nju.edu.cn (Y.Y.); taoli66@xjtu.edu.cn (T.L.)


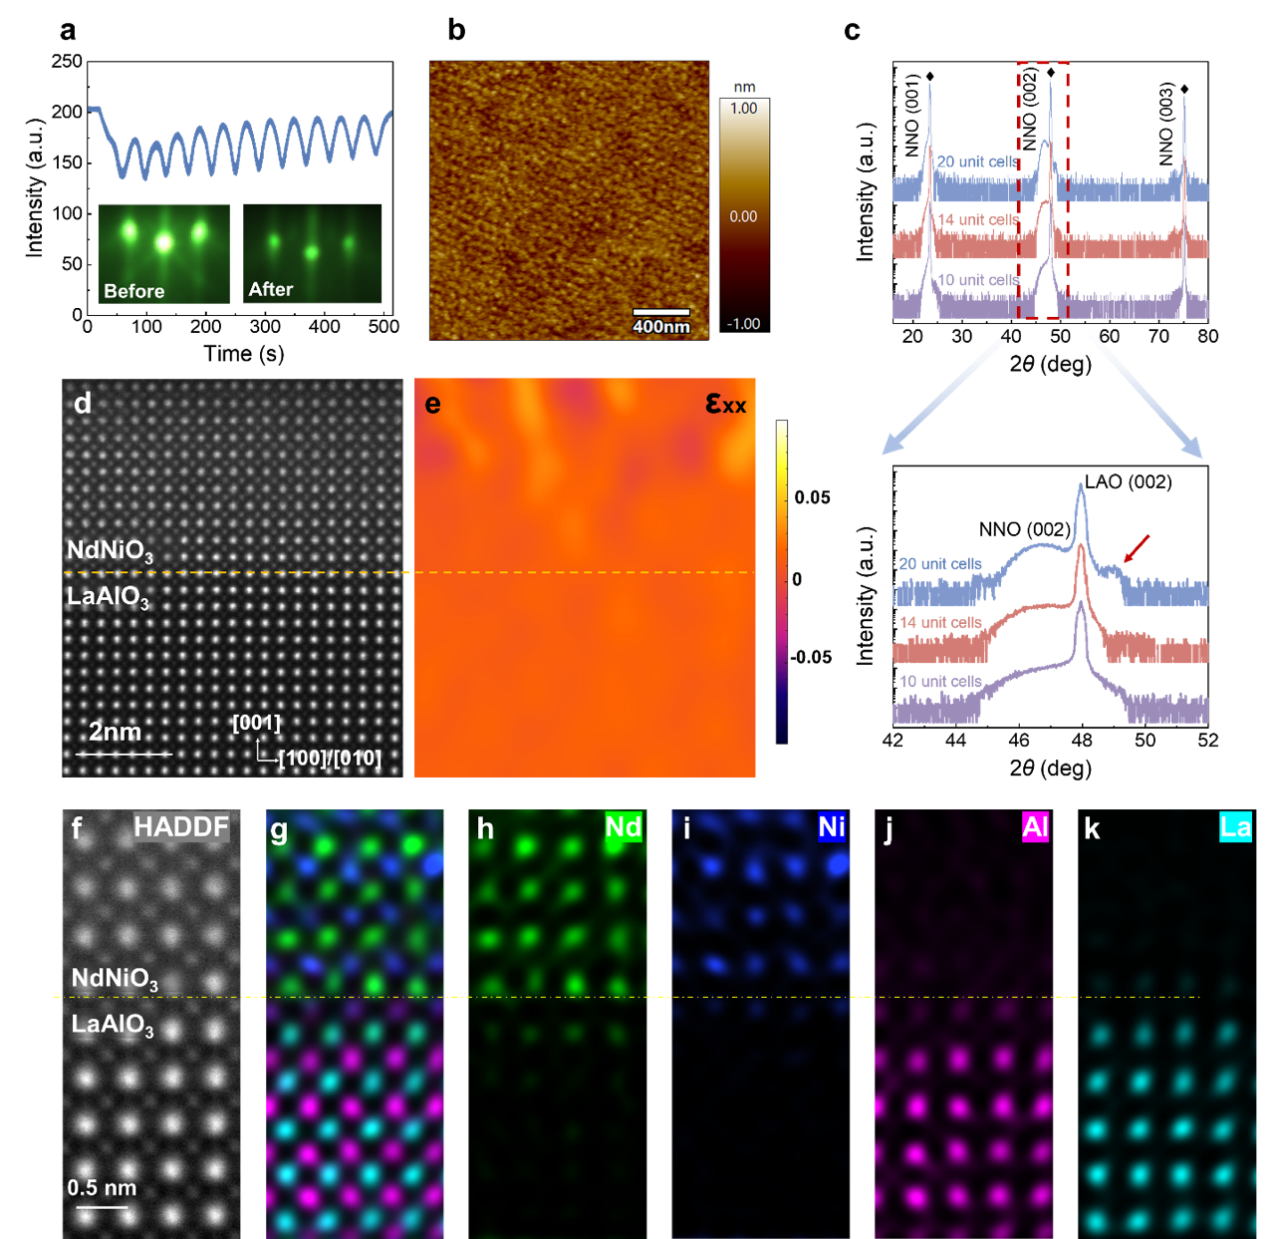


**Extended Data Fig. 1 | Ozone-assisted PLD deposition of epitaxial NdNiO3 films on (001)-oriented LaAlO3 single crystal substrate.** **a,** RHEED intensity oscillation during the PLD deposition process of a representative NNO film with a thickness of 12 unit cells. The insets show RHEED diffraction patterns from the LAO substrate before deposition and from the NNO film after PLD deposition, demonstrating a two-dimensional, layer-by-layer growth pattern. **b,** An AFM morphology image of an as-grown NNO film with a root-mean-square roughness of 0.157 nm. **c,** The full X-ray diffraction XRD spectra of 10, 14, and 20 unit-cell thick (001)-oriented NNO films,with an enlarged view near the(002) peaks shown below. The distinct peaks associated with the presence of the Laue fringe are indicated by the red arrow. **d, e,** HAADF-STEM image of the heteroepitaxial NNO/LAO (**d**) and respective deformation of the in-plane lattice parameter of the NNO film with respect to the LAO substrate (*εxx*, color scales) by geometrical phase analysis (GPA) (**e**). *εxx* is virtually zero throughout the NNO film, showing a good in-plane lattice match. **f-k,** Cross-sectional HAADF-STEM image of the film and corresponding elemental mappings of full, Nd, Ni, Al, and La, respectively.

**
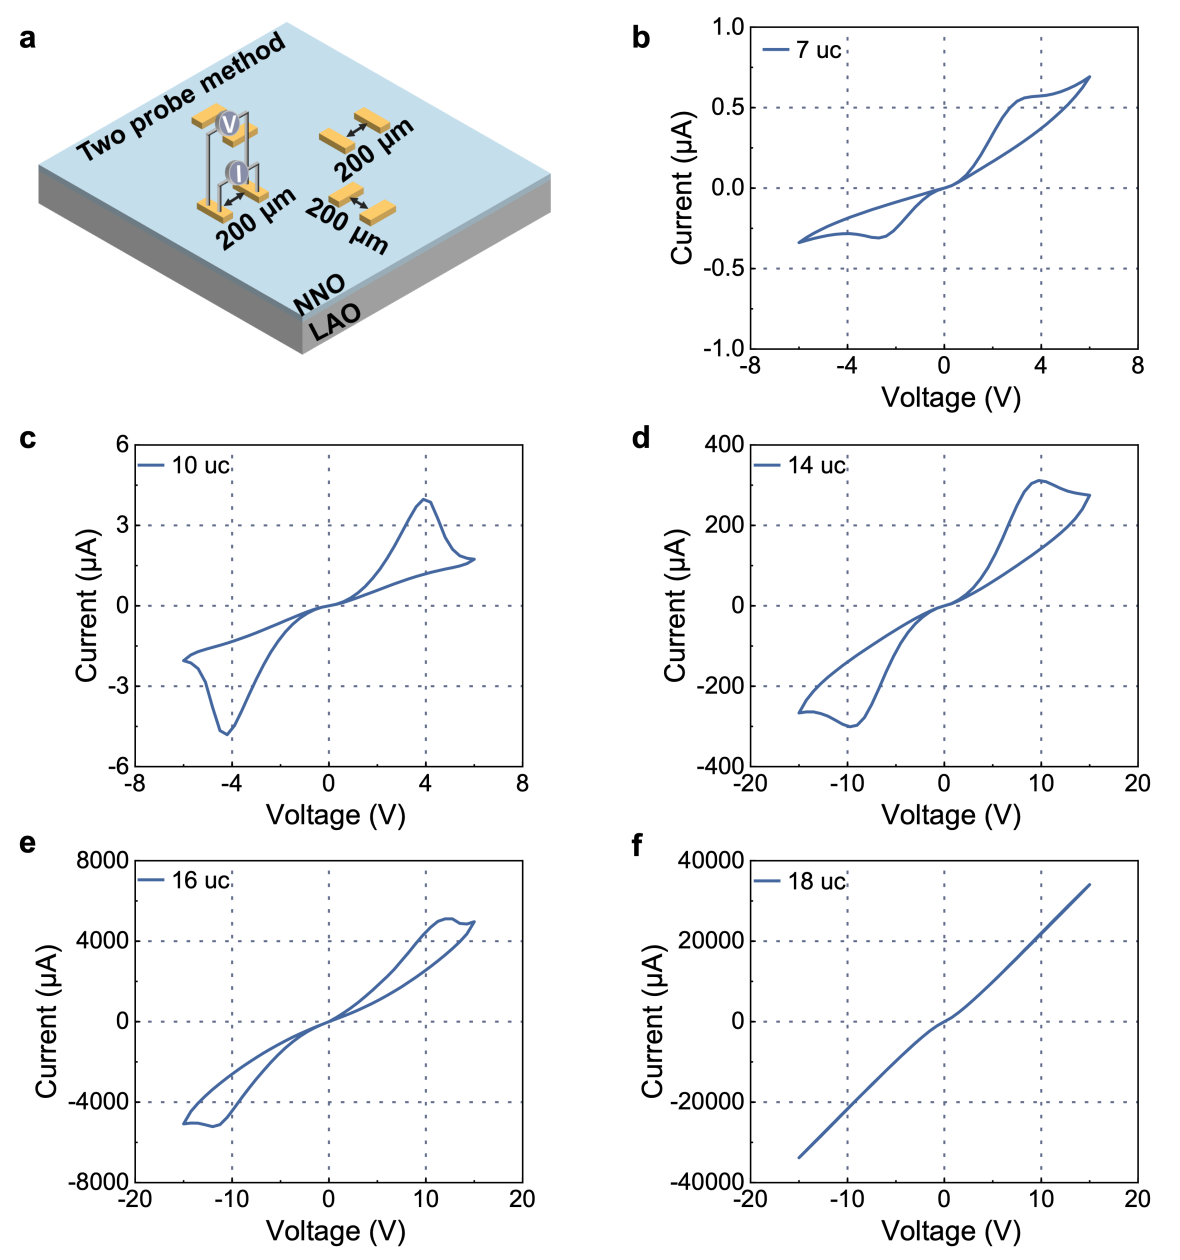
**

**Extended Data Fig. 2 | DC *I*-*V* sweeps of (001)-oriented NNO films with different thicknesses. a,** Schematic for DC *I-V* sweep and PUND measurements.The distance between the electrodes is 200 μm as labelled. **b-f,** DC *I*-*V* sweeps of (001)-oriented NNO films with thickness ranging from 7 to 18 unit cells.

**
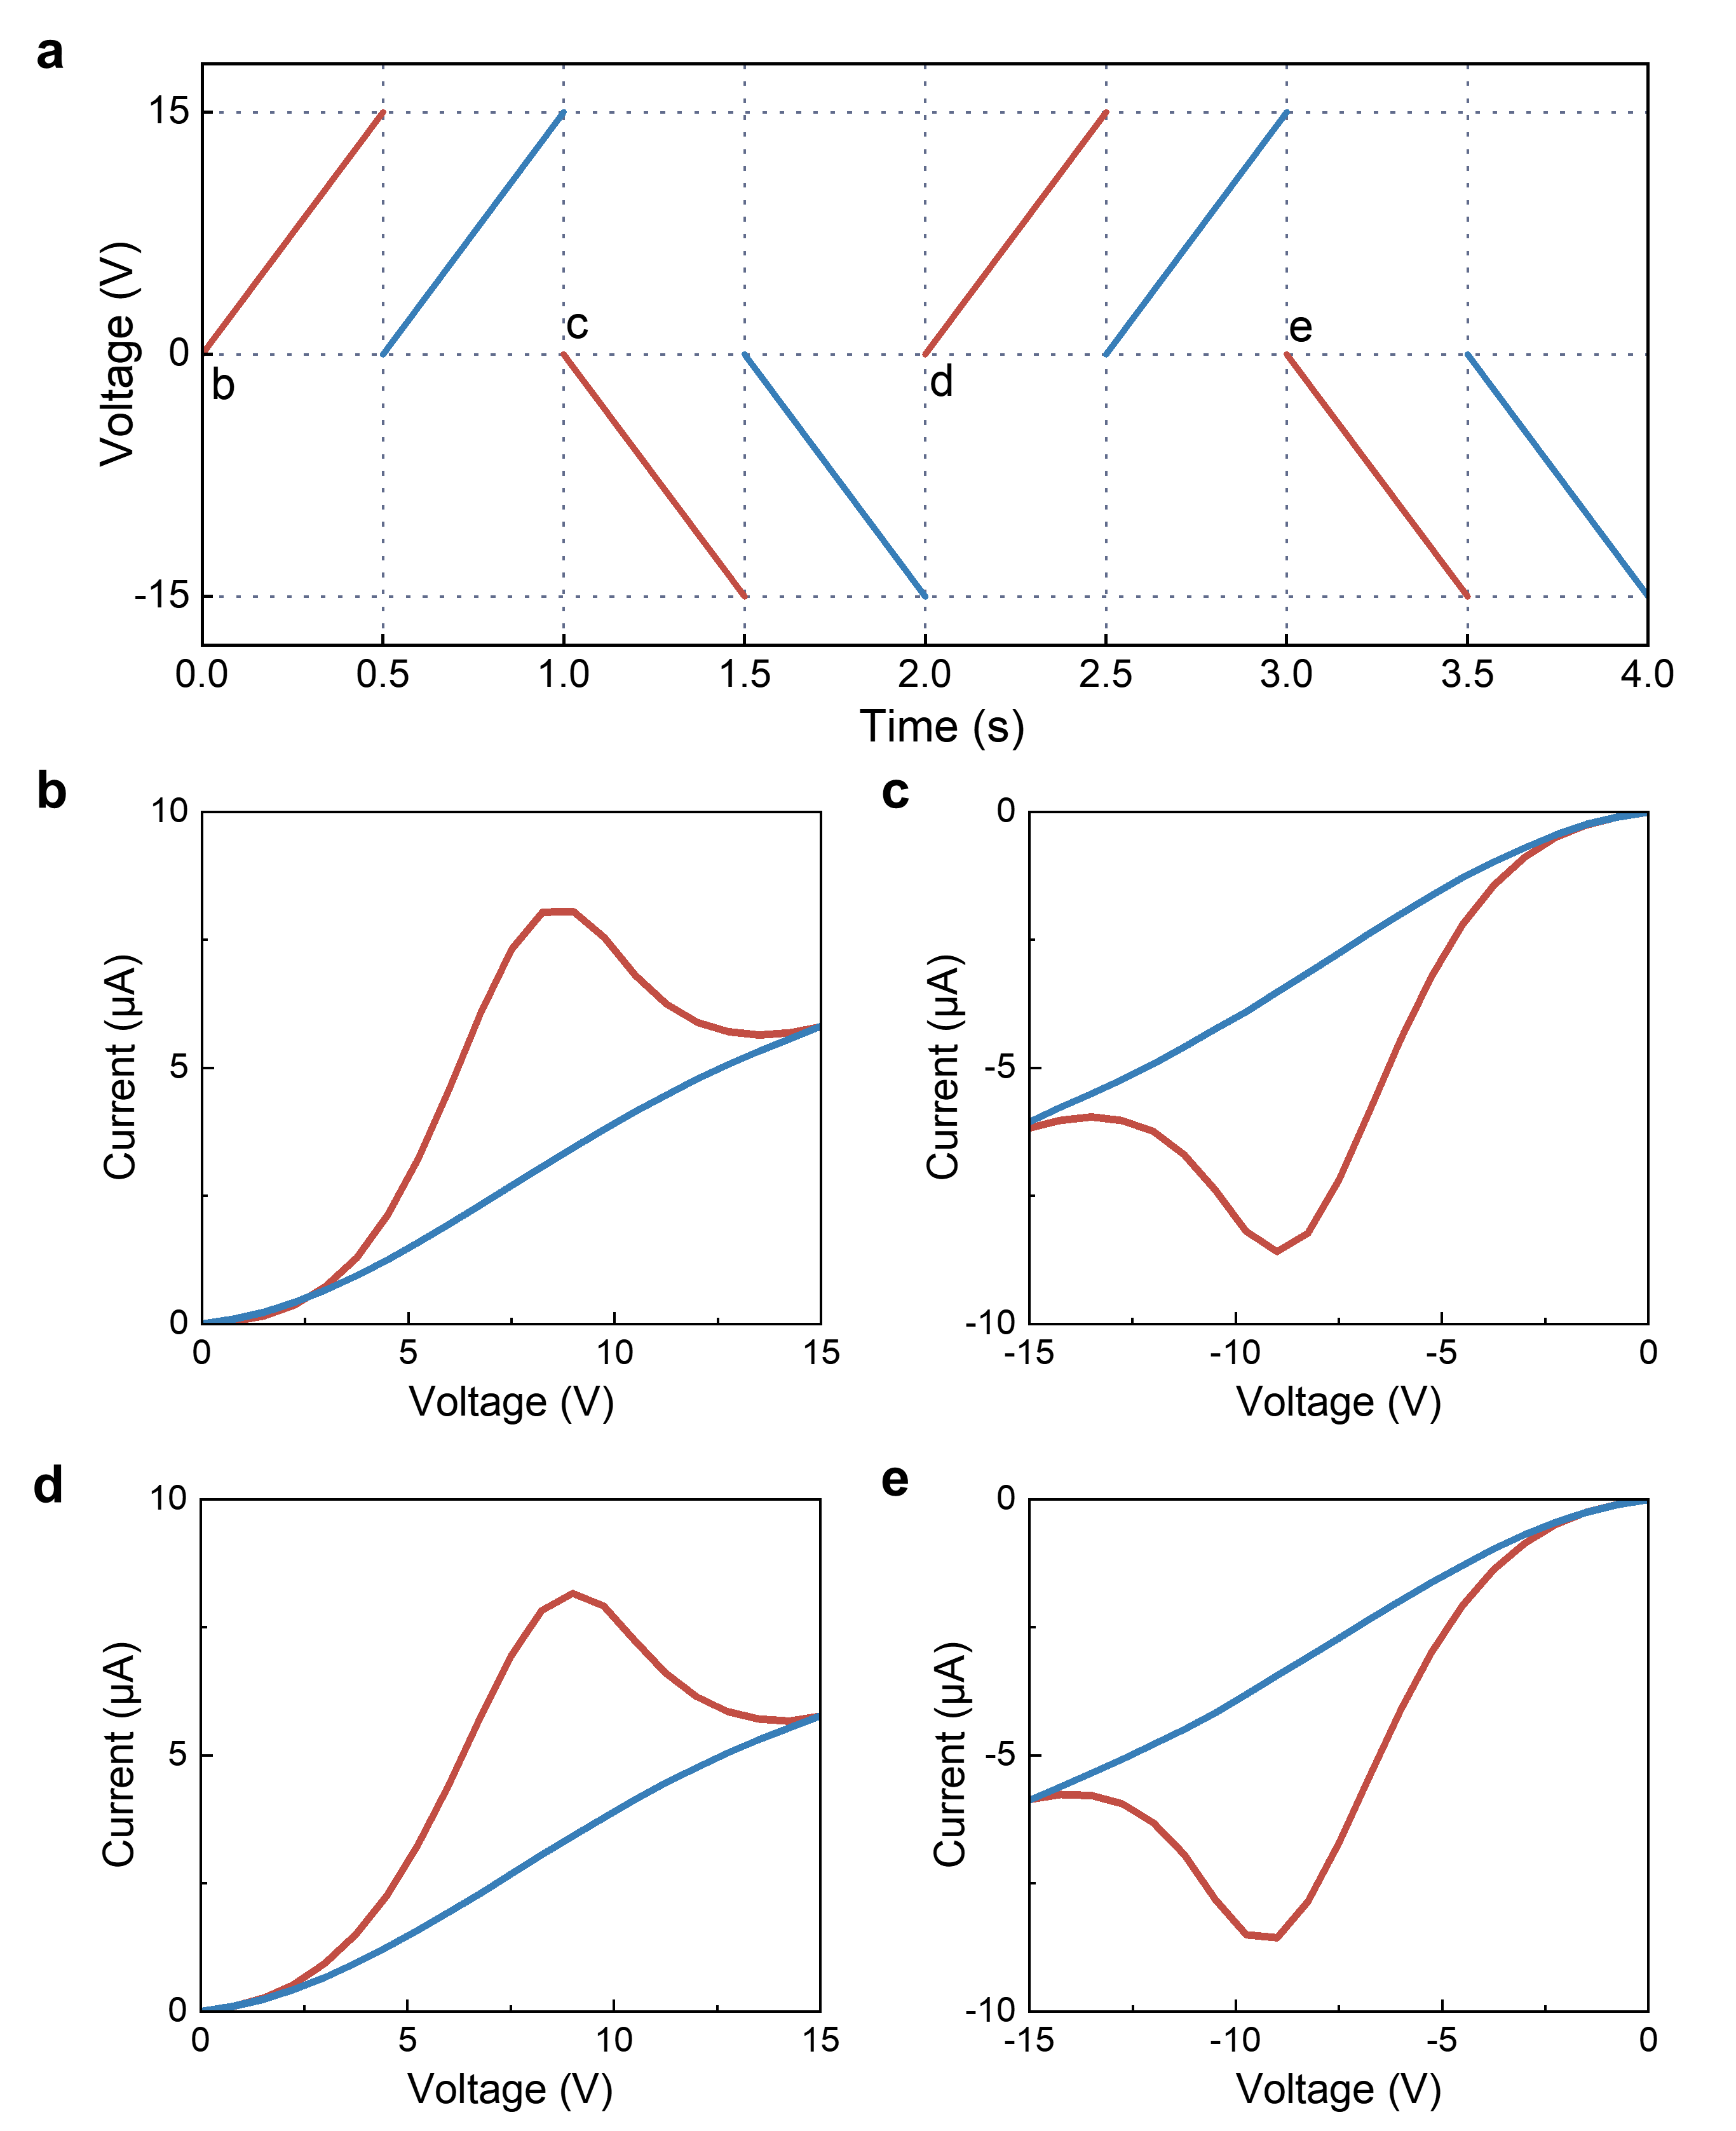
**

**Extended Data Fig. 3 | Double-wave measurements of (001)-oriented NNO thin film with a thickness of 10 unit cells. a,** Applied voltage window (0 to +15 V and 0 to −15 V) over time. The voltage waveform was applied twice at the positive and negative bias windows, respectively. **b-e,** *I-V* curves for different double wave sweeps labeled as (b)-(e) in a. The red and blue lines represent the first and second sweeps, respectively.

**
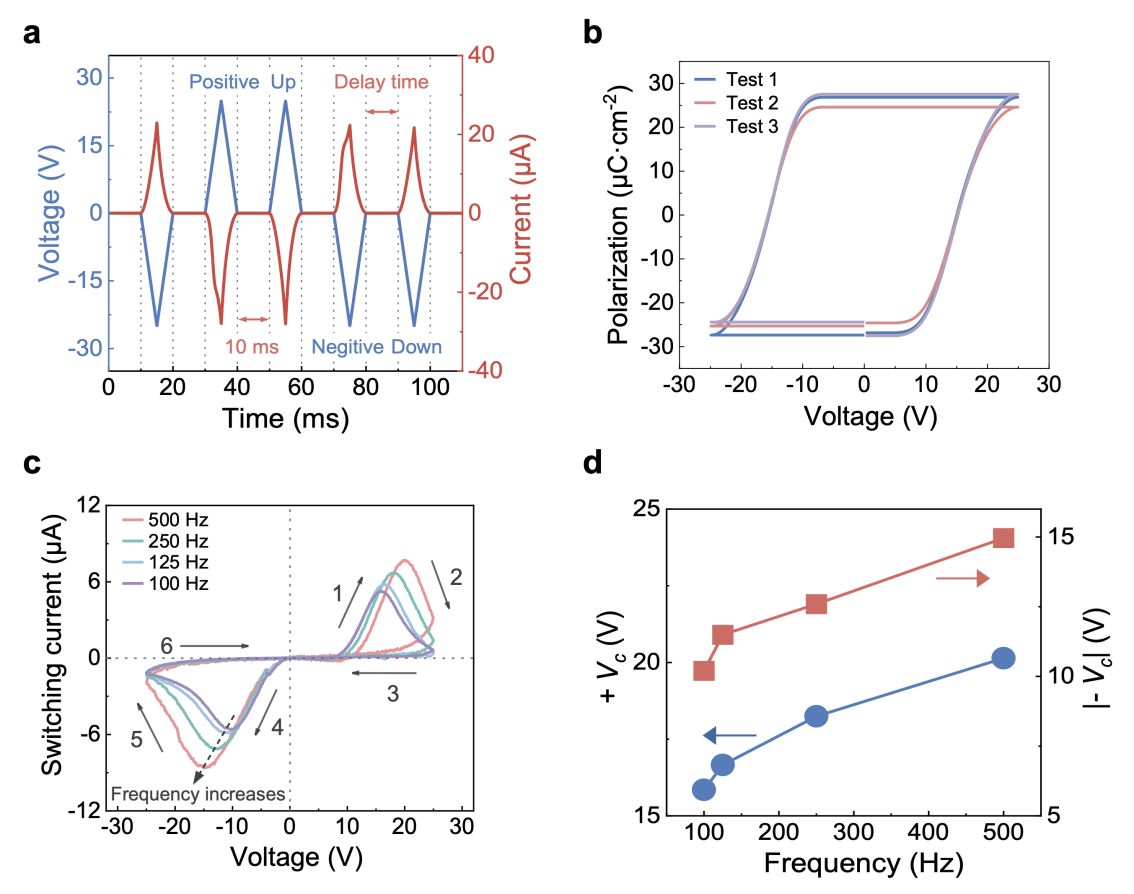
**

**Extended Data Fig. 4 | Positive up negative down (PUND) measurements. a,** PUND waveform (blue) and the observed raw current signal (red) from a 10 unit-cell thick (001)-oriented NNO film under a frequency of 100 Hz. **b,** *P-V* loops obtained from different devices on NNO films with thicknesses of 10 unit cells. The remanent polarization ranges from 24.5 to 27.5 µC cm-2. **c,** Frequency-dependent *I-V* curves after subtracting the nonferroelectric response in PUND measurements. The numbers and arrows indicate the sweeping sequence. **d,** Coercive voltages (*VC*), which correspond to the positive and negative current peaks, are plotted against the PUND measurement frequencies.

**
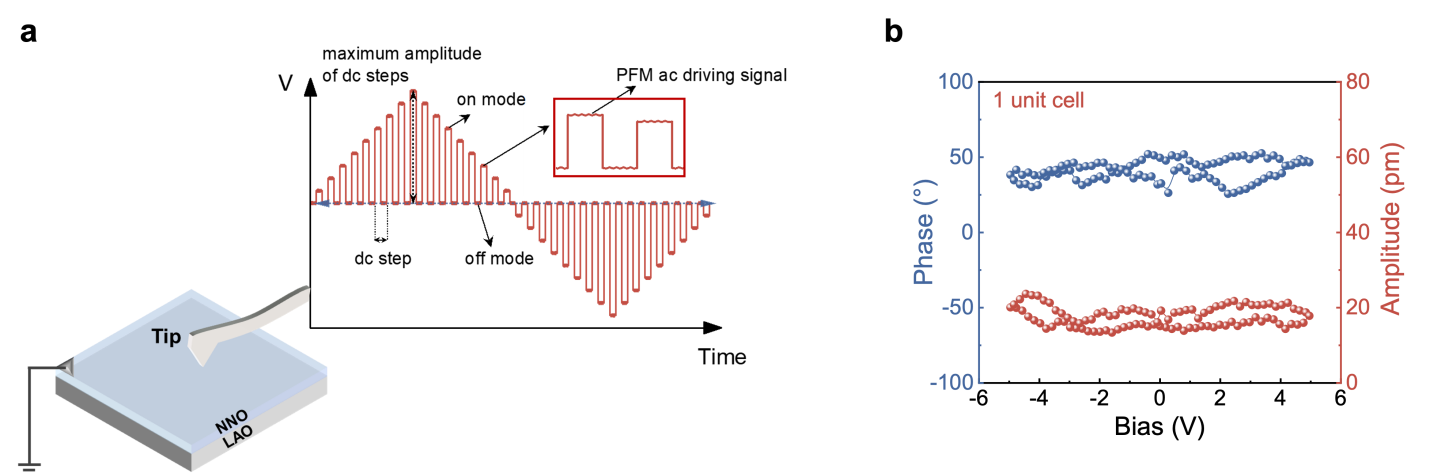
**

**Extended Data Fig. 5| Switching Spectroscopy PFM measurements. a,** Schematic of PFM measurement. The sample is grounded via the side of the NNO ultrathin films, while the electric bias is applied through the conductive probe. The local remanent ferroelectric hysteresis loops are acquired by the demonstrated triangular-square voltage waveform. **b,** No hysteresis loops can be obtained on 1 unit-cell thick NNO films.


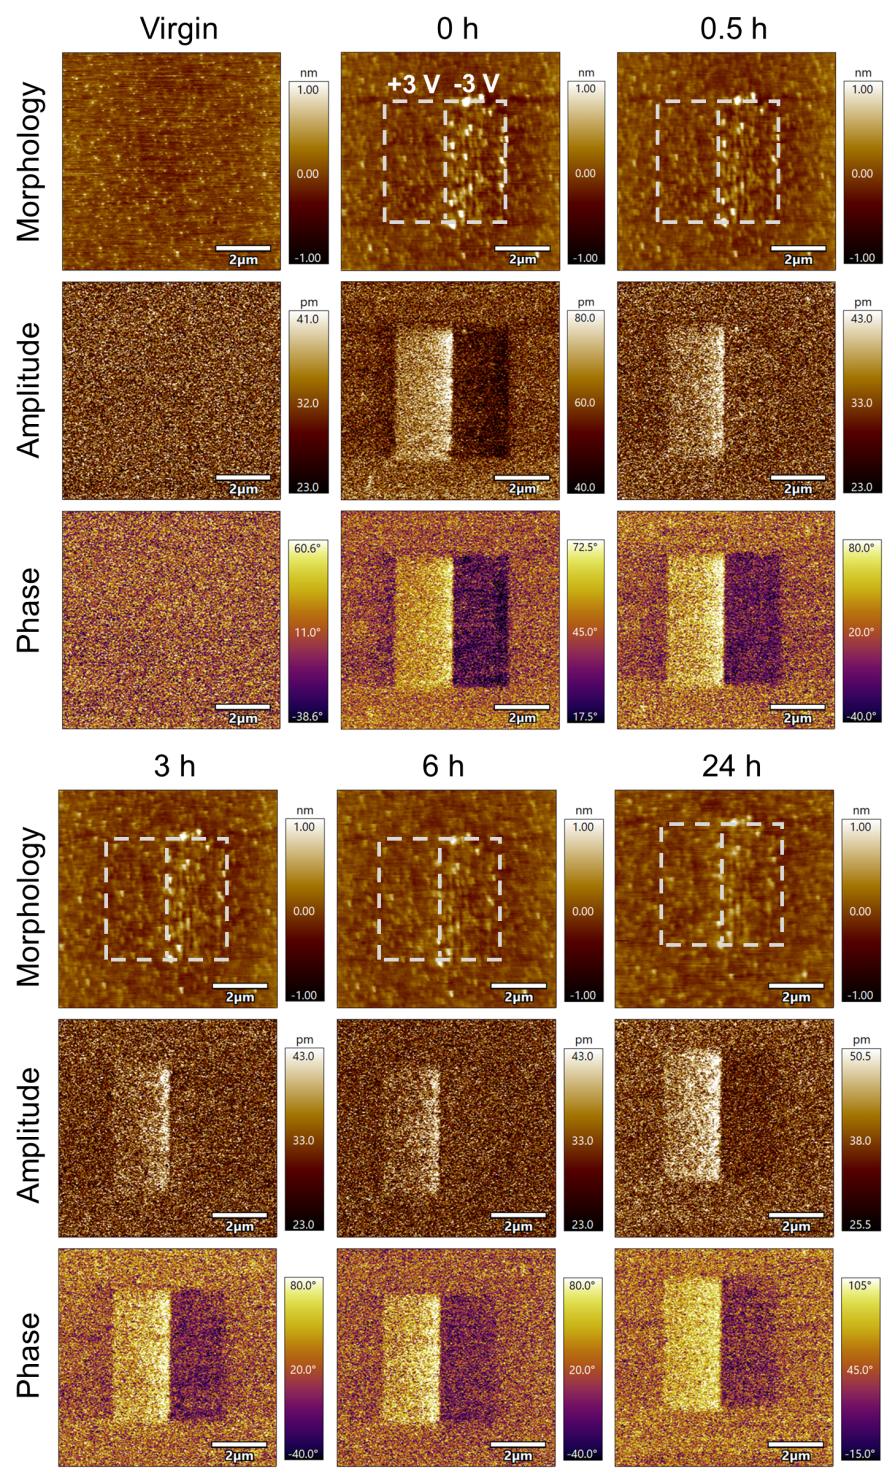


**Extended Data Fig. 6 | Electric poling and ferroelectric polarization retention measurements of (001)-oriented NNO thin film.** The morphology, amplitude, and phase evolution with time after domain poling using ±3 *V*DC voltages.

**
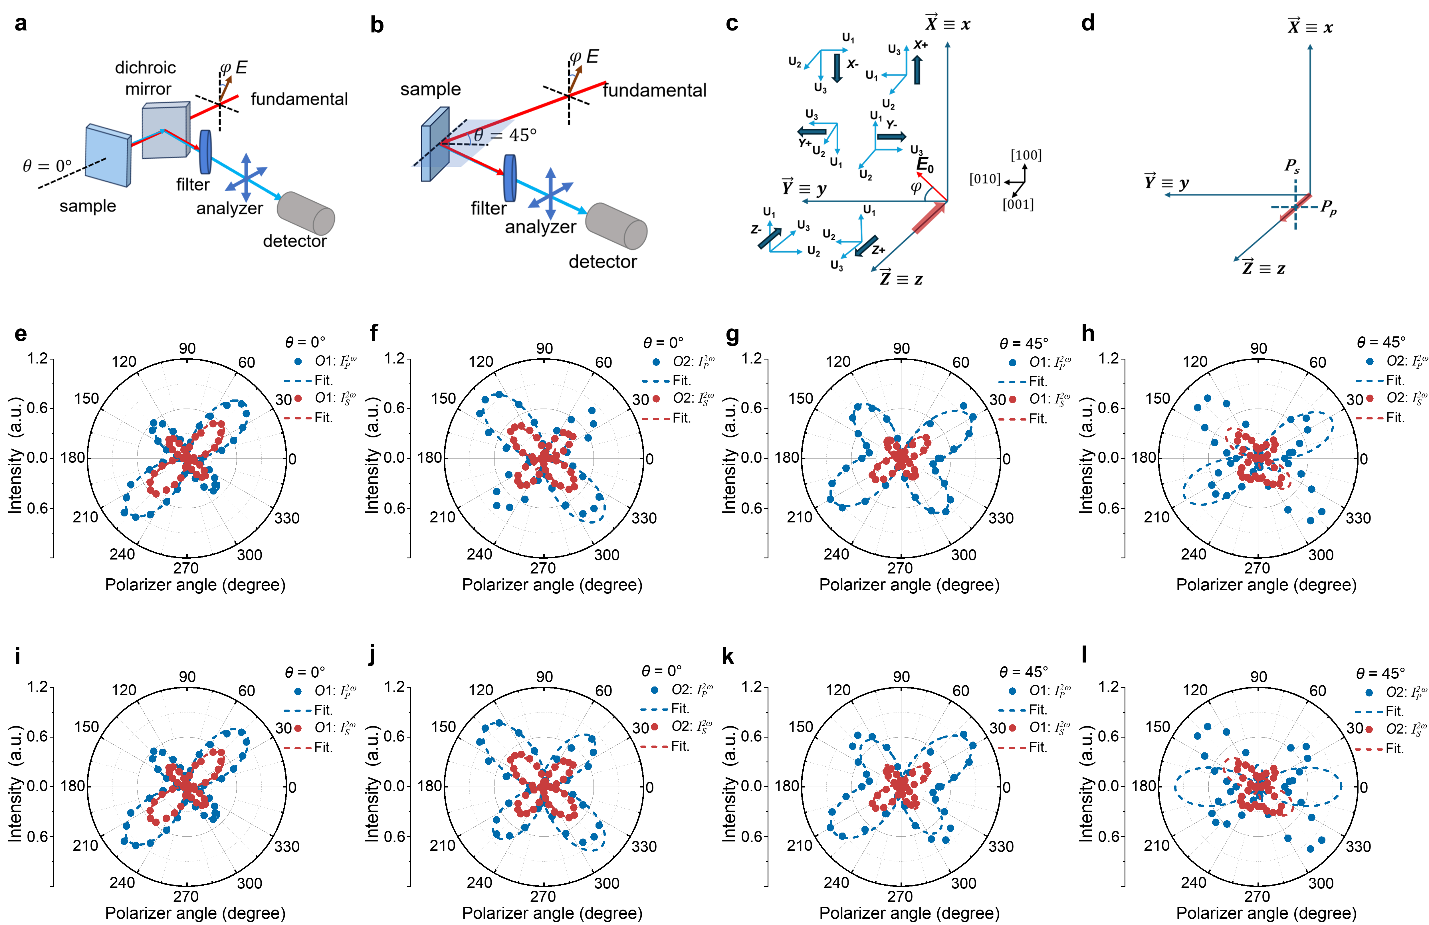
**

**Extended Data Fig. 7 | SHG measurements of NNO ultrathin films with a thickness of 10 unit cells. a, b,** Schematic diagrams of SHG measurements of the normal incidence configuration (**a**) and oblique incidence configuration (**b**). *θ* and *φ* denote the incident angle and the polarization angle of the fundamental laser beam, respectively. **c,** Schematic illustration of the six possible domain variants (X+, X-, Y+, Y-, Z+, and Z-) in the x-y-z space, along with the corresponding crystal axes (U1, U2, U3) for each variant. The incident light *E*0 is linearly polarized, with the azimuthal angle between the direction of *E*0 and the y-axis defined as *φ*. **d,** Schematic of the emitted second harmonic wave, showing the two polarization configurations (*P*p and *P*s) for the analyzer. **e-h,** SHG polar plot fittings using point group *C*4. When the sample is rotated by 90° in-plane (**f, h**), the polar plots do not satisfy *C*4 symmetry. **i-l,** SHG polar plot fittings using point group *C*4v. When the sample is rotated by 90° in-plane (**j, l**), the polar plots do not satisfy *C*4v symmetry.


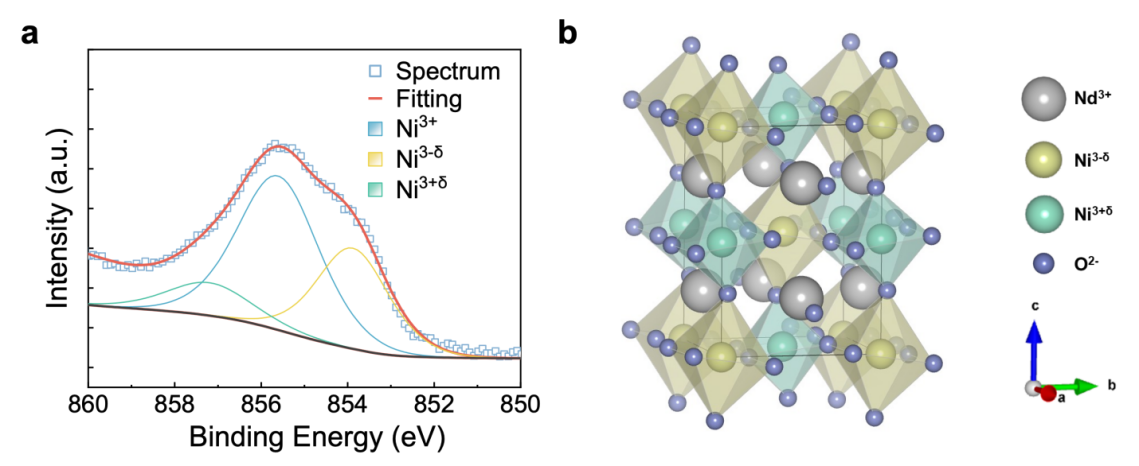


**Extended Data Fig. 8 | Multivalent Ni ions in NNO thin film. a,** XPS spectrum of Ni 2*p* in (001)-oriented NNO film with thicknesses of 15 unit cells. Revealed the multivalency of Ni ions. **b,** Schematic of the nonequilibrium geometrically stabilized structure of the NNO unit cell. Green, yellow, grey, and purple balls represent Ni3+δ, Ni3-δ, Nd3+, and O2- ions, respectively.


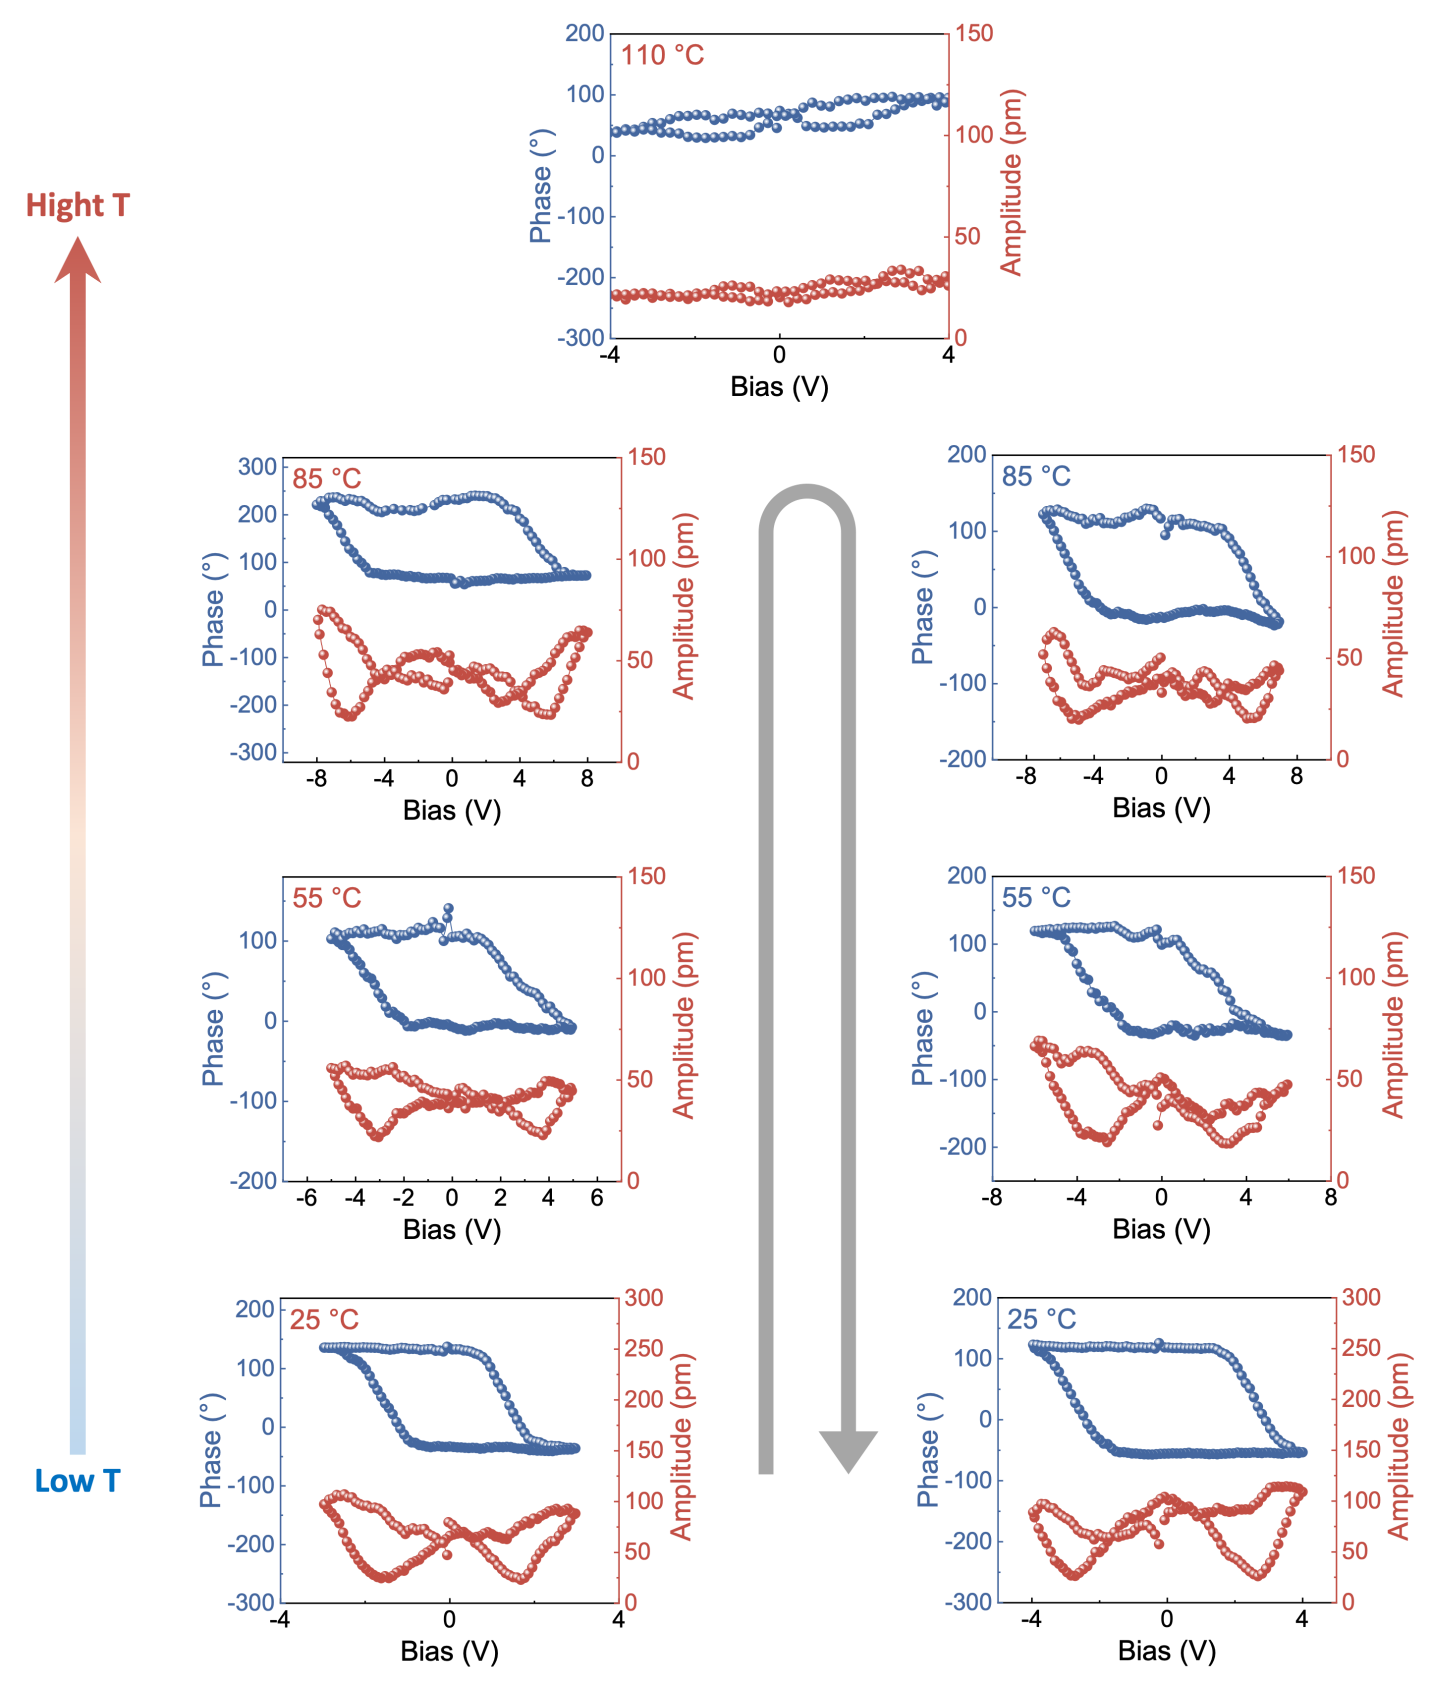


**Extended Data Fig. 9 | Temperature-dependent PFM hysteresis loops in amplitude and phase of 14 unit-cell thick (001)-oriented NNO thin film.** The gray arrow indicates the temperature-varying sequence.


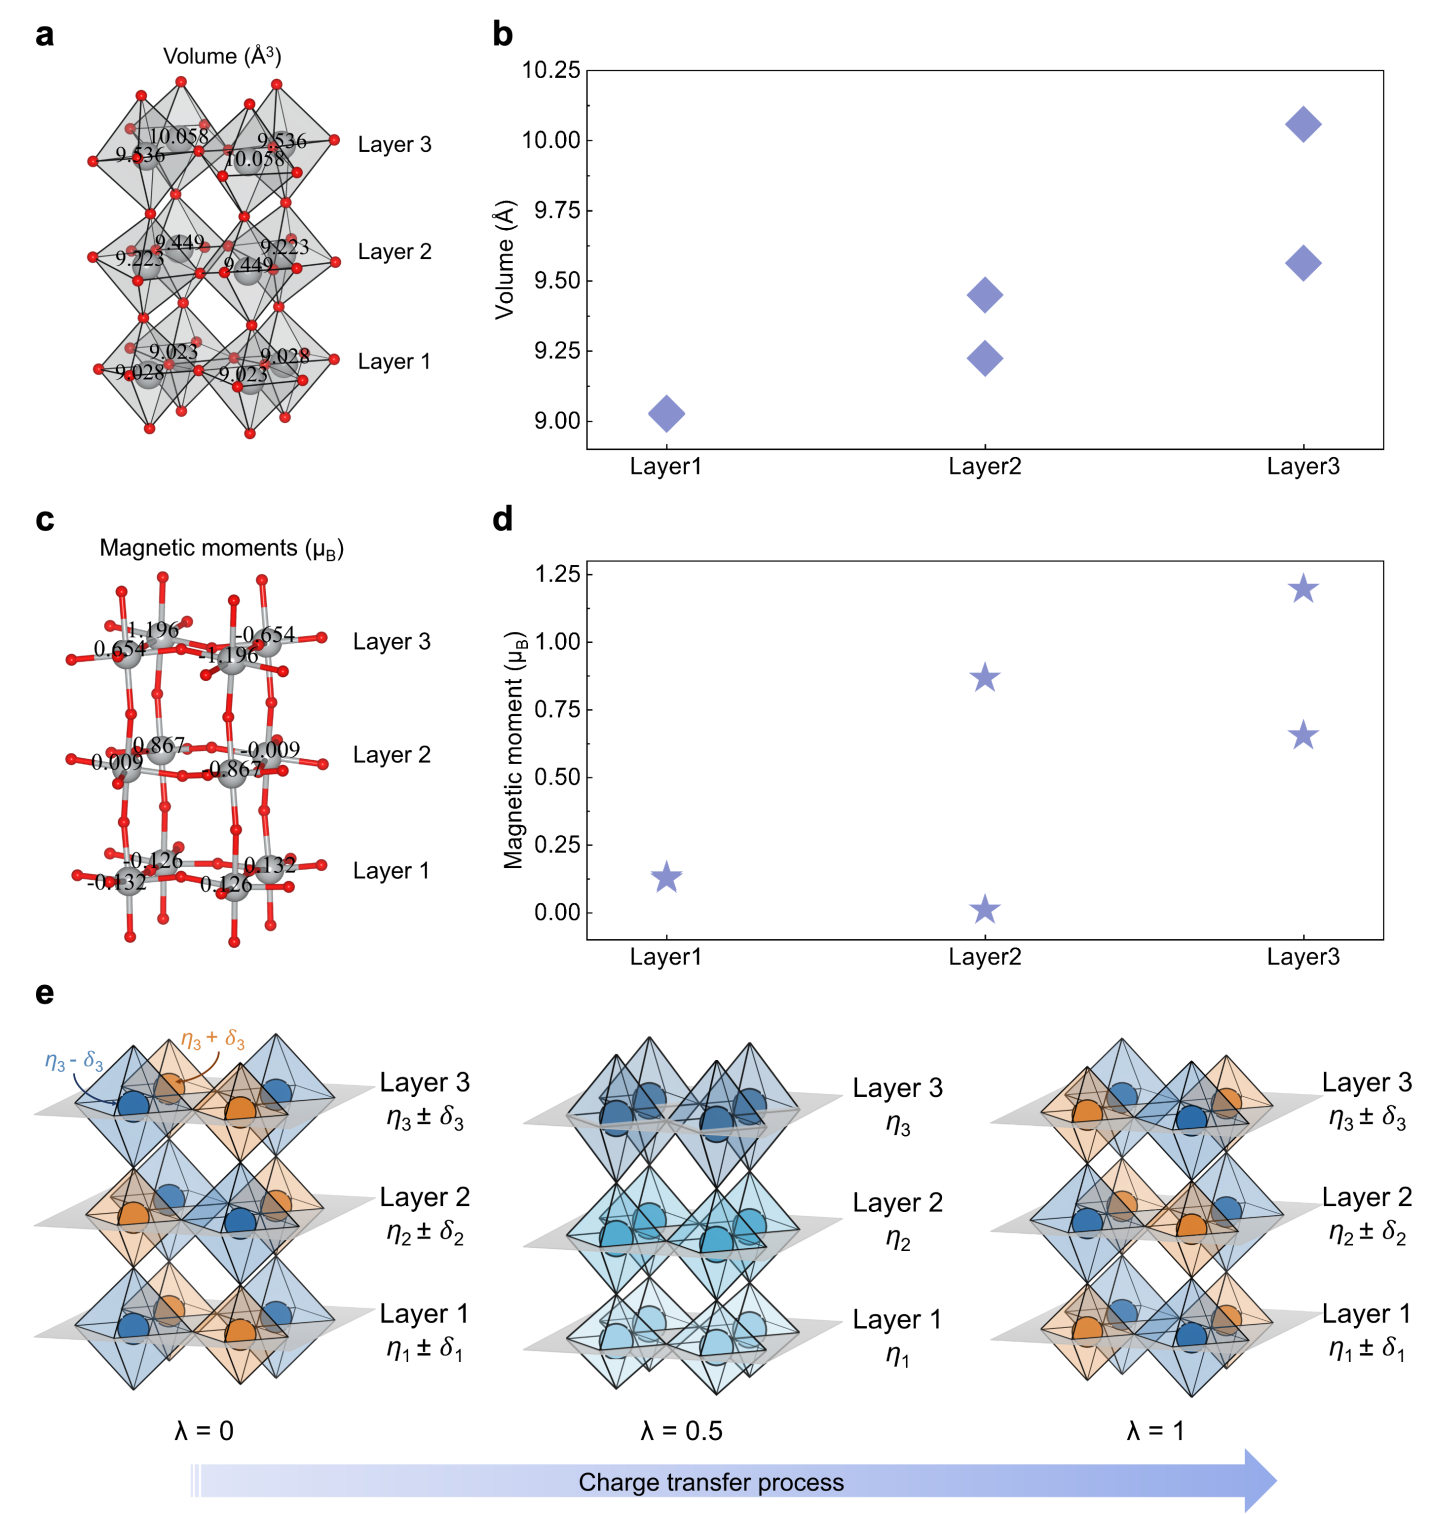


**Extended Data Fig. 10 | Comprehensive analysis of layer-dependent checkerboard charge order in (001)-oriented NNO thin films. a**, Spatial mapping of oxygen octahedron volumes, showing an intralayer checkerboard pattern with variation across layers 1–3 (bottom to top). **b**, Quantified layer-resolved trend of the octahedron volume extracted from panel (**a**). **c**, Spatial mapping of the local magnetic moment on each Ni ion. **d**, Quantified layer-resolved trend of the Ni magnetic moment extracted from panel (**c**). **e,** Schematic of the charge-ordered states of the 3 unit cells thick NNO film along the charge transfer process. The *η*x (x = 1, 2, 3) represents the base charge, and *𝛿*x (x = 1, 2, 3) represents the charge transfer for each corresponding layer.
